# Supplementary material for: Reduced Retinoic Acid Receptor Beta (Rarβ) Affects Pancreatic β-Cell Physiology
Source: MDPI journal article supplement (doi:10.3390/biology11071072), 2022-07-19

Replicate 1

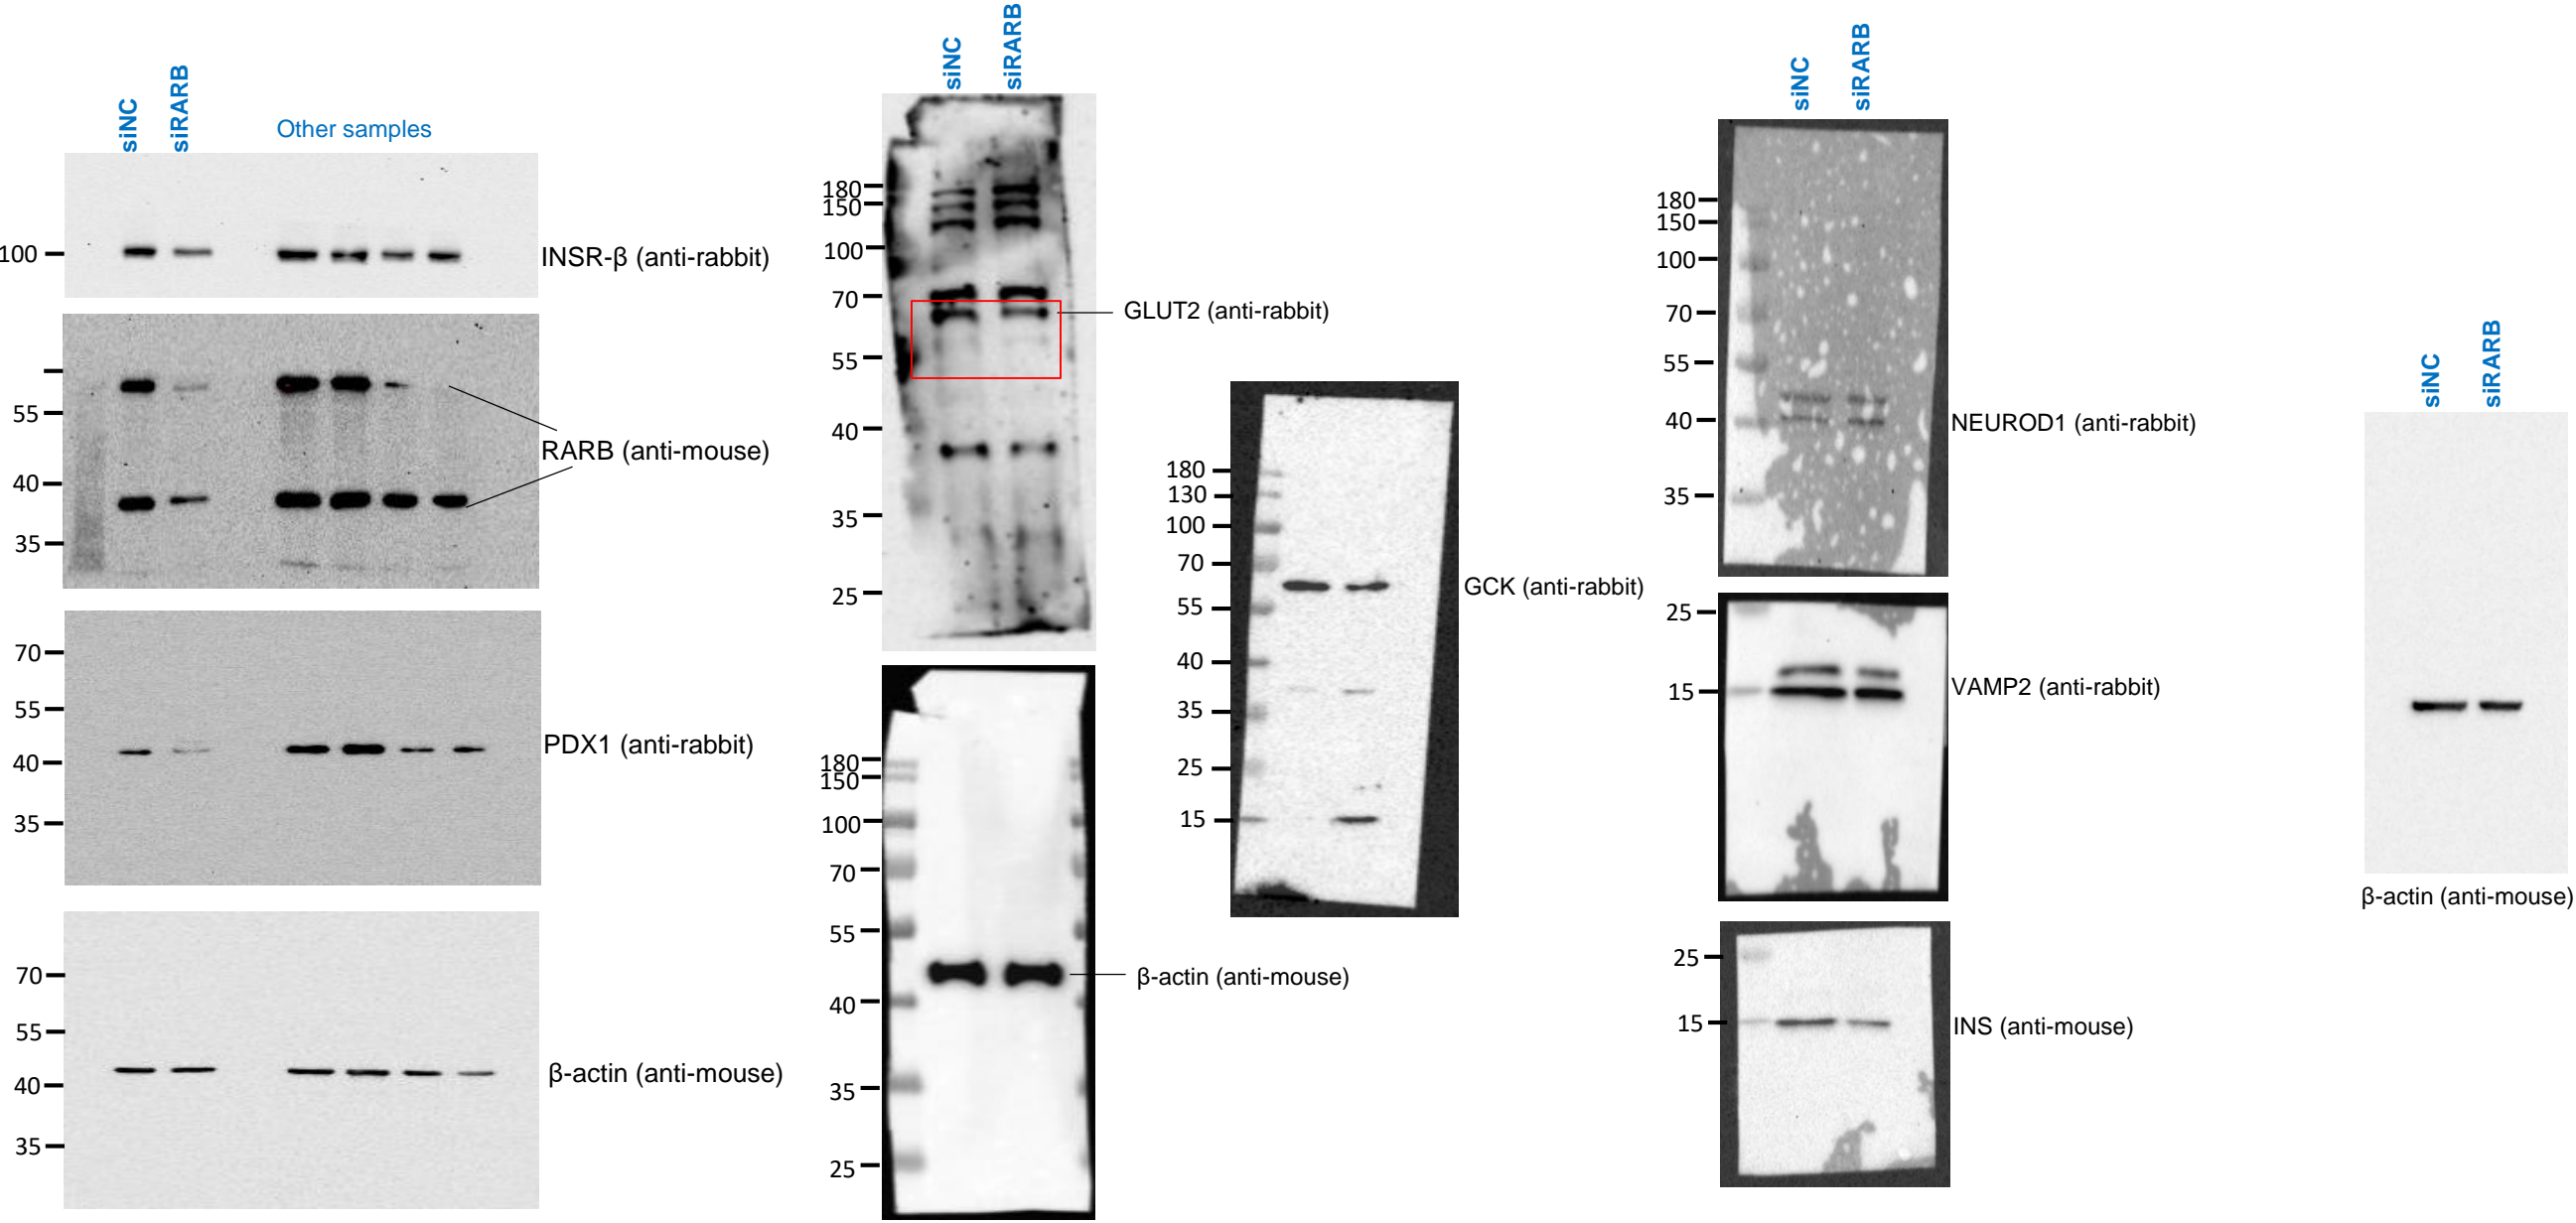

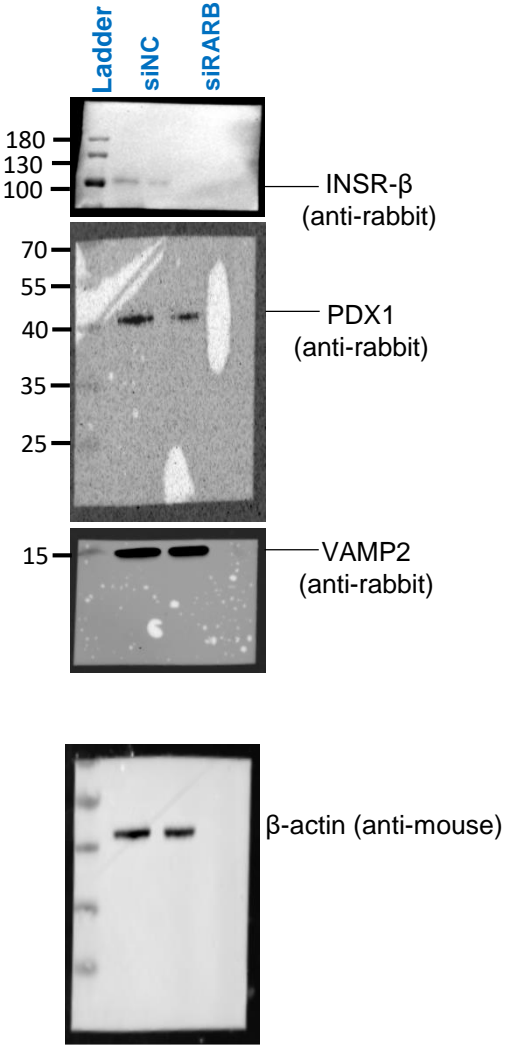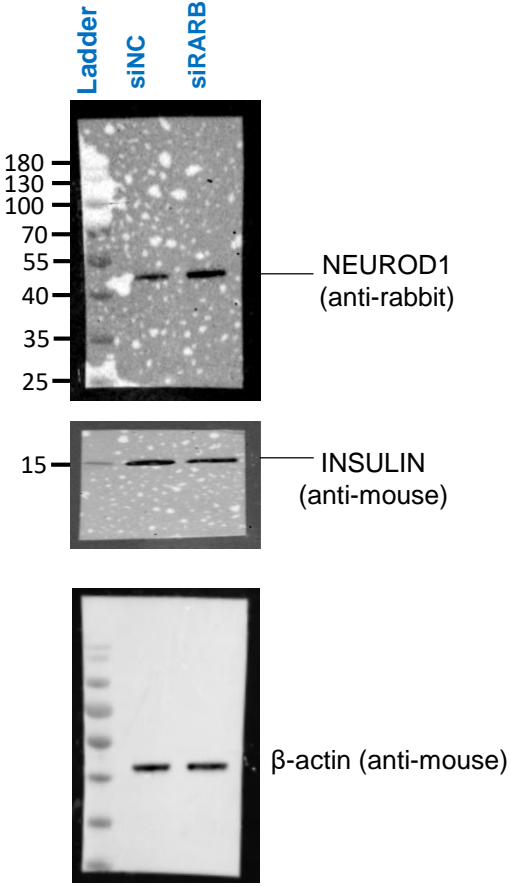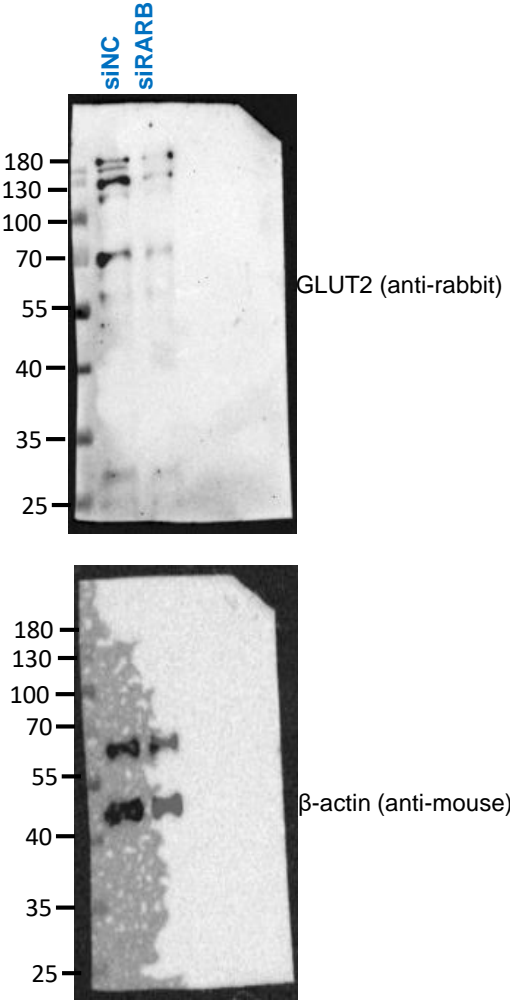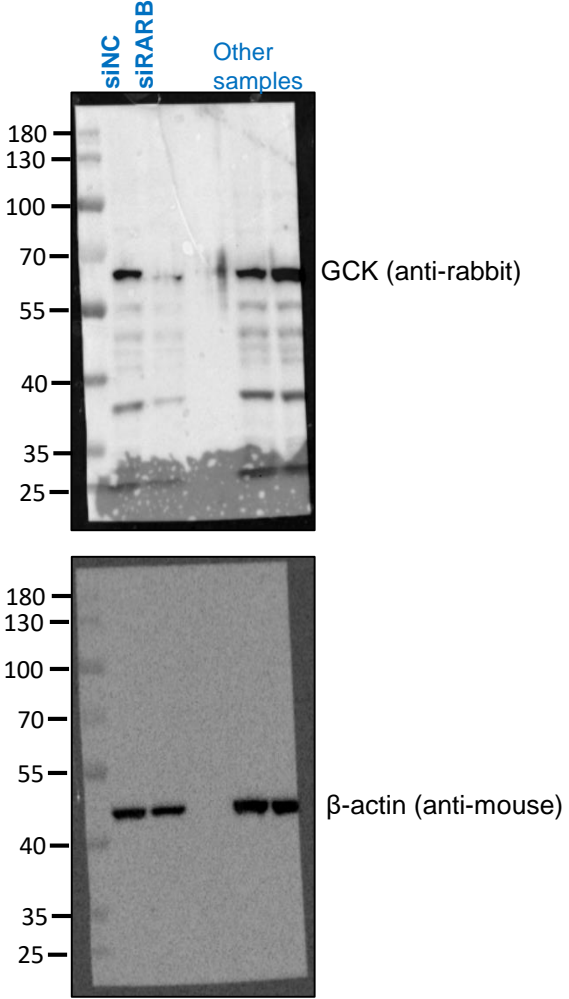

Replicate 3

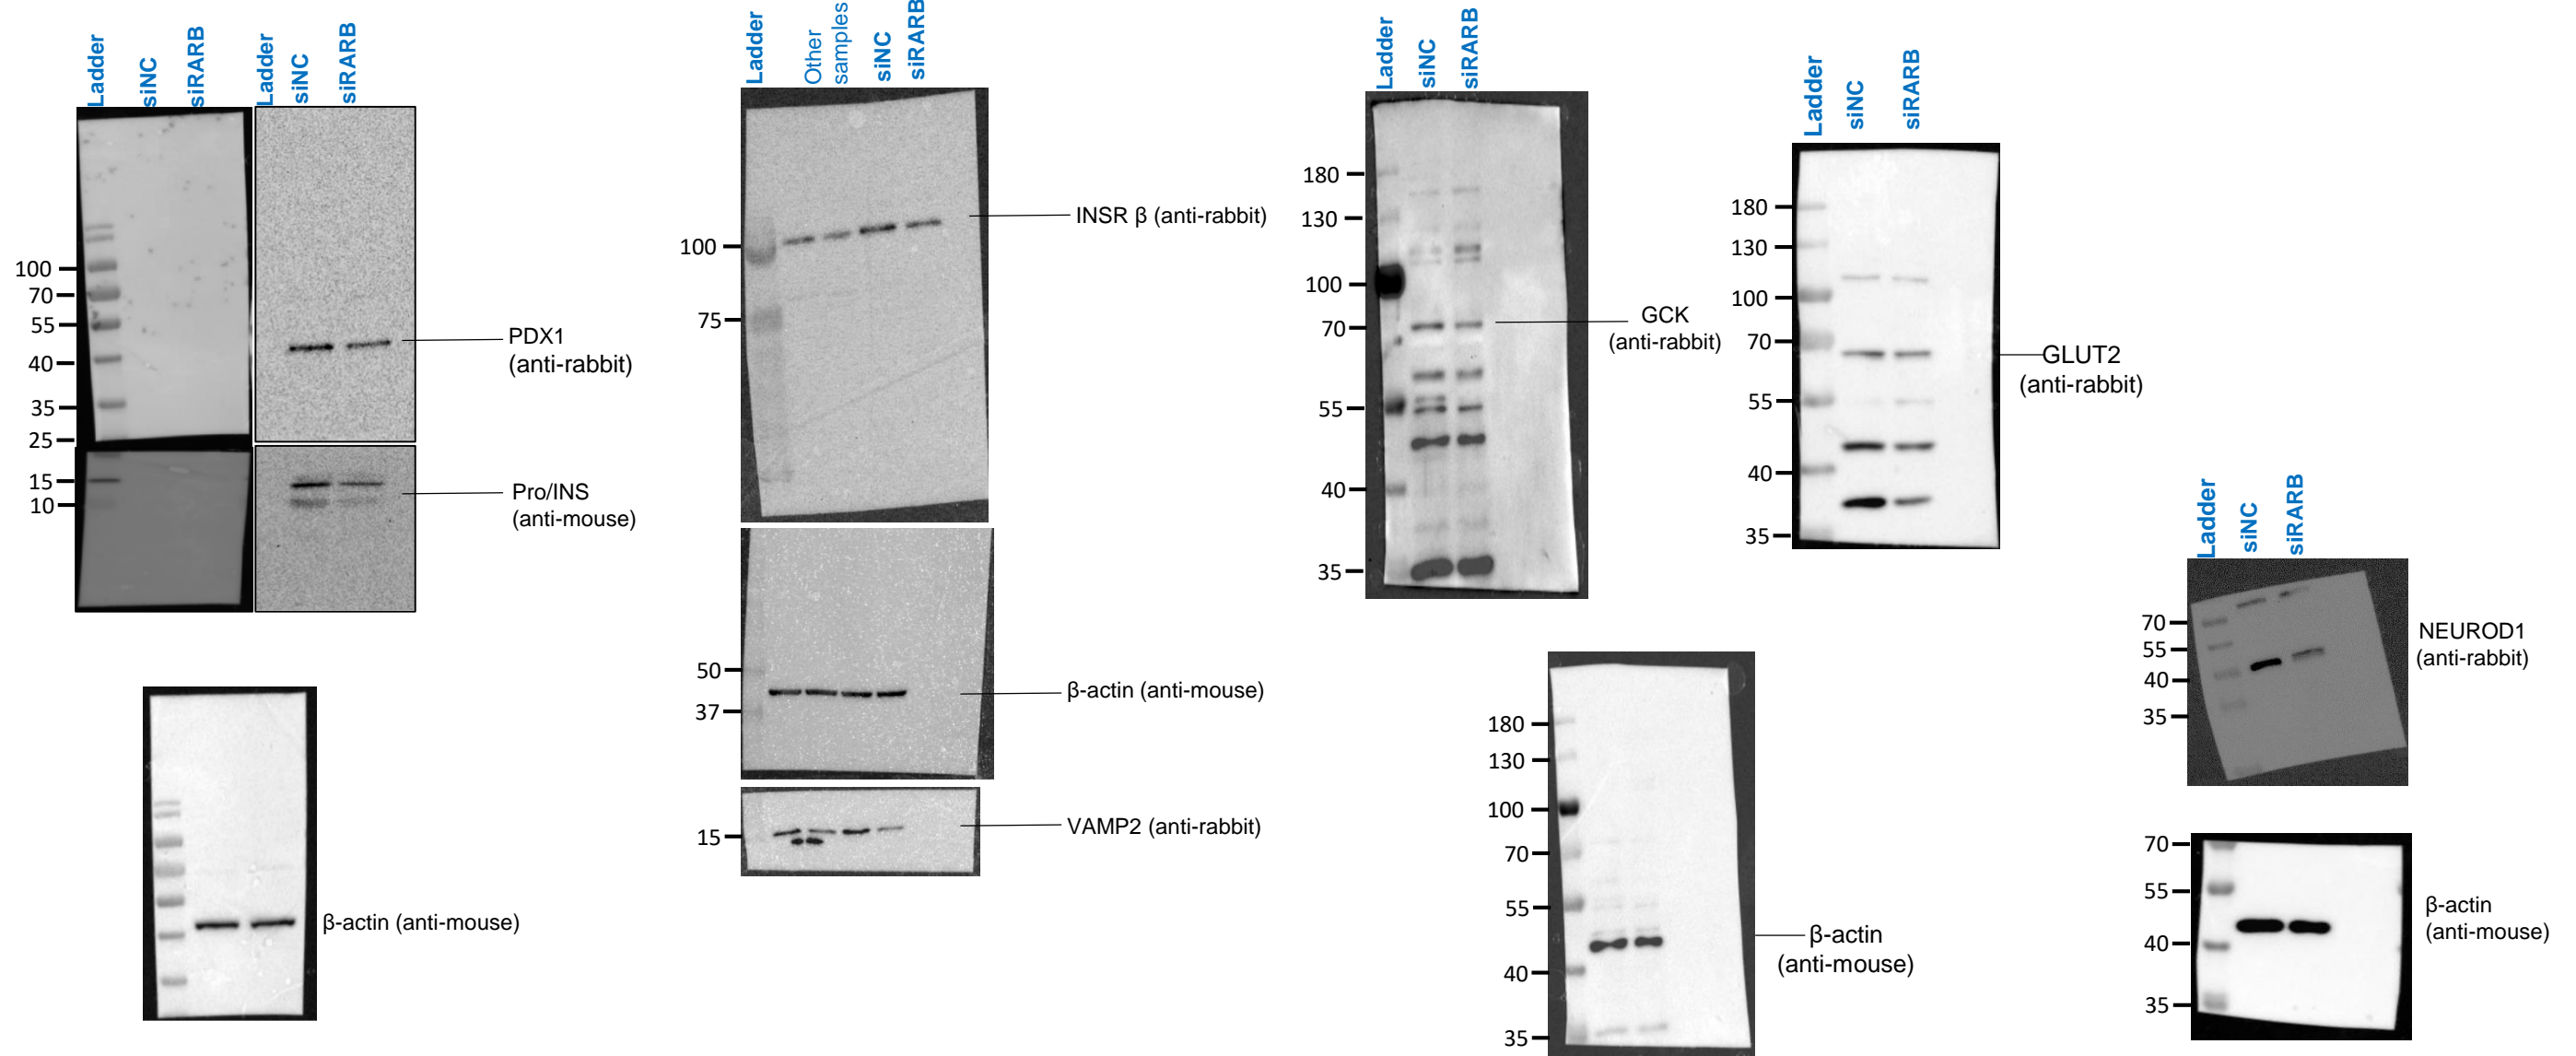

# pAKT and total AKT protein Expression

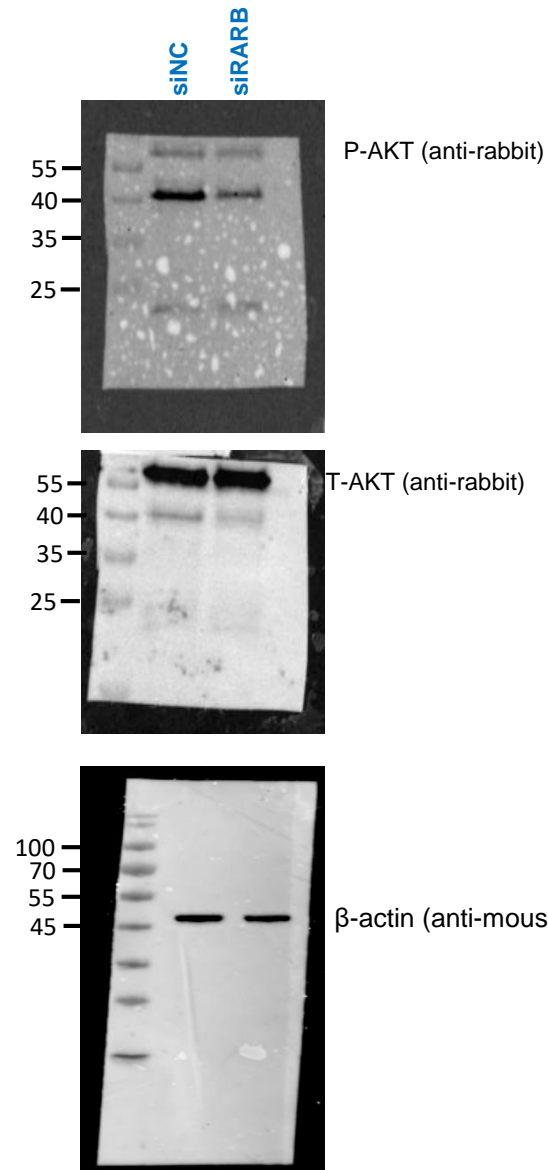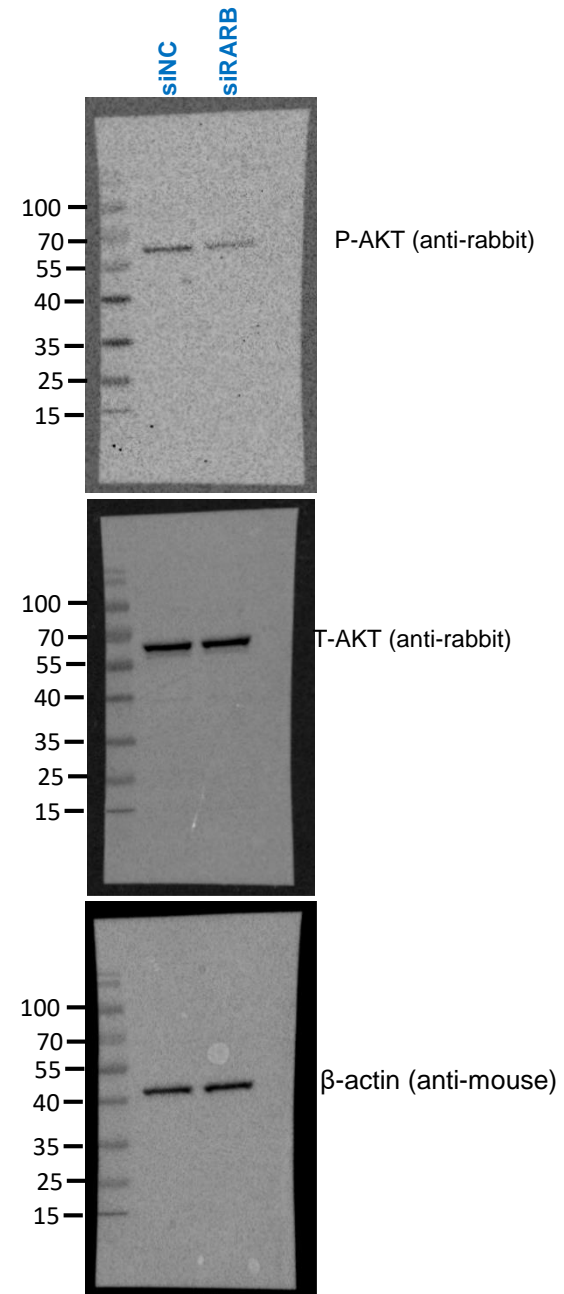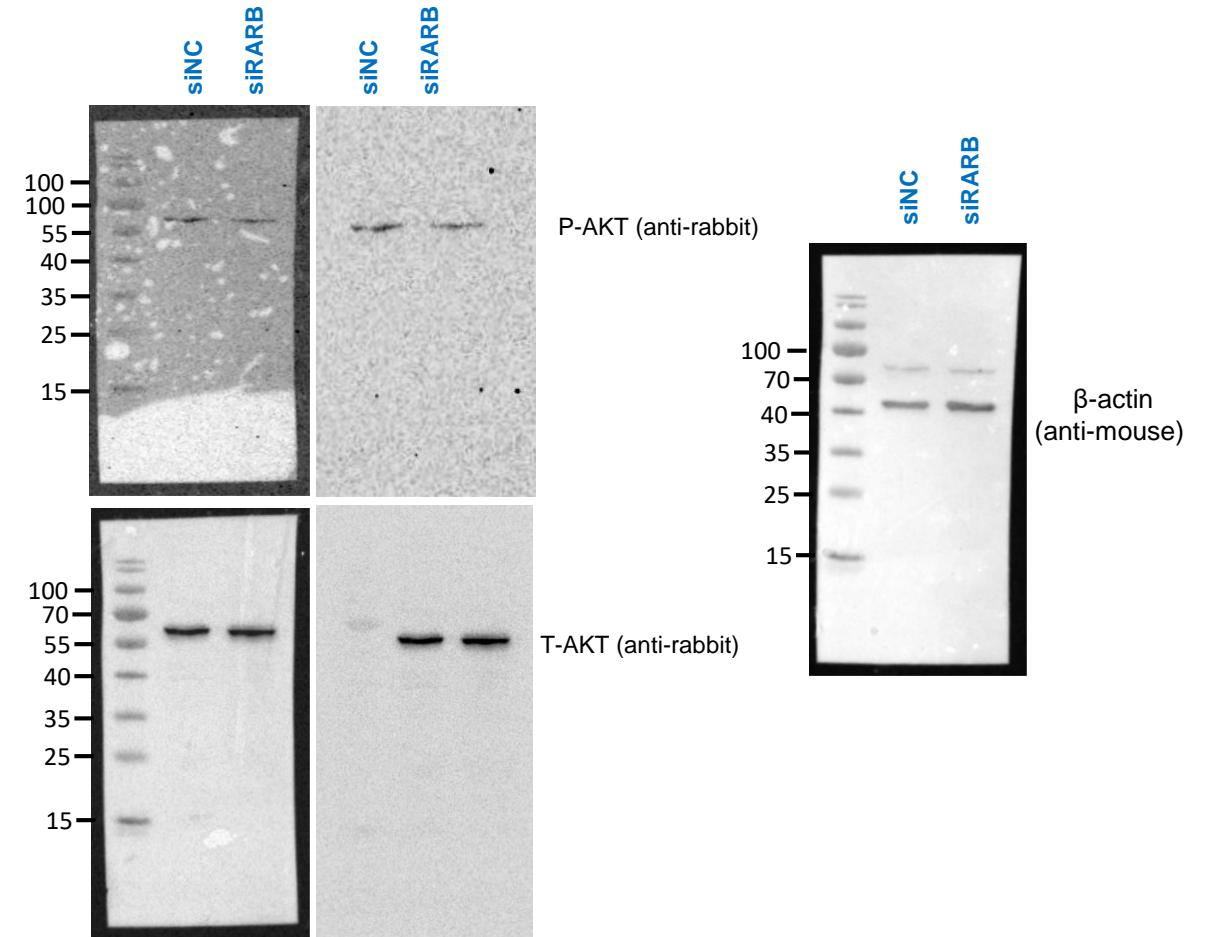



# RARB Protein Expression

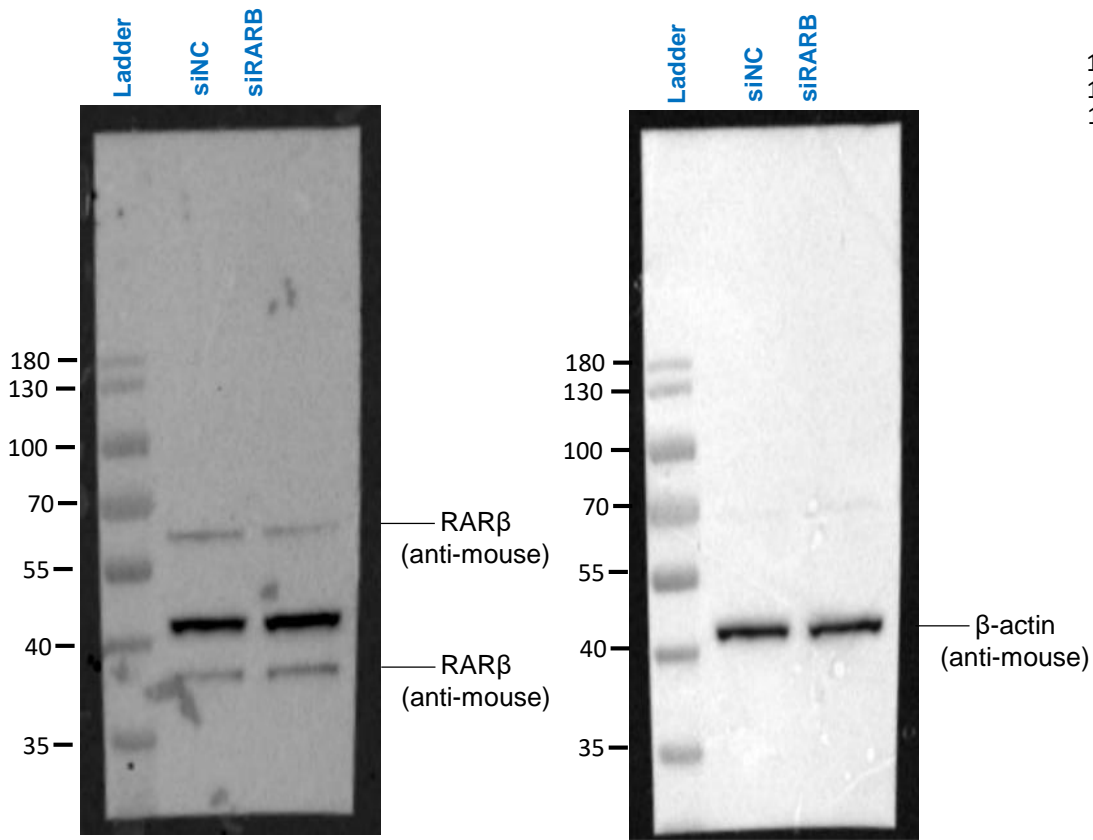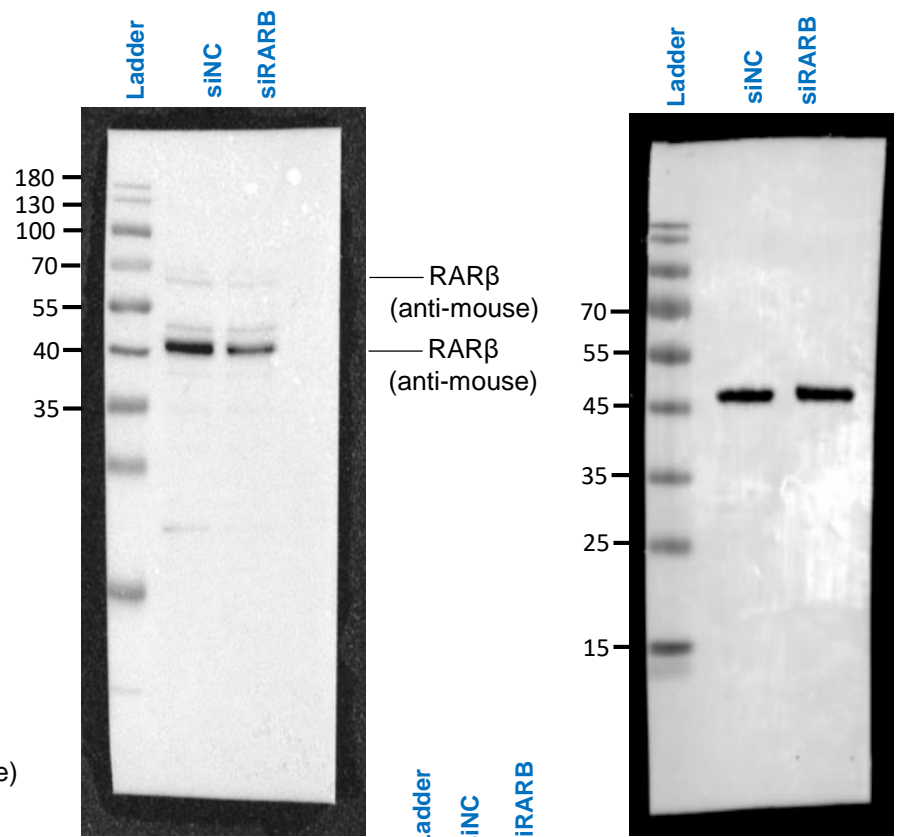

## RARB Expression in human islets

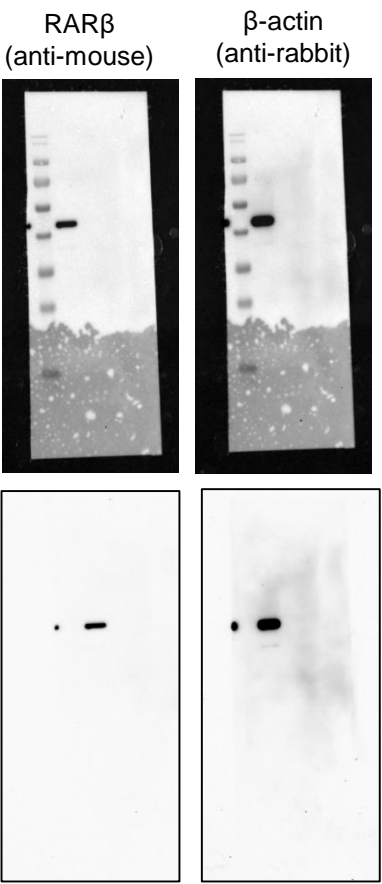

Supplement: s1 [file s1]
